# Supplementary material for: A Bifunctional Pt/CeO2-Cu1/CeO2 Catalyst System for Isooctane Oxidation under Fully Simulated Engine-Exhaust Condition: Eliminating the Inhibition by CO
Source: MDPI journal article supplement (doi:10.3390/catal13030508), 2023-03-01
Supplement: s1 [file s1]

Supplementary

# A bifunctional Pt/CeO<sub>2</sub>-Cu<sub>1</sub>/CeO<sub>2</sub> catalyst system for isooctane oxidation under fully simulated engine exhaust condition: eliminating the inhibition by CO

Fan Lin <sup>1</sup>, Carlos E. García-Vargas <sup>2</sup> and Yong Wang <sup>1,2,\*</sup>

<sup>1</sup> Institute for Integrated Catalysis, Pacific Northwest National Laboratory, Richland, Washington 99354 and USA

<sup>2</sup> The Gene and Linda Voiland School of Chemical Engineering and Bioengineering, Washington State University, Pullman, Washington 99164, USA

\* Correspondence: yong.wang@pnnl.gov

## S1. Comparison of isooctane oxidation activity of Pt/CeO<sub>2</sub> + Cu<sub>1</sub>/CeO<sub>2</sub> catalyst mixture under the O<sub>2</sub>+NO+CO and S-GDI conditions

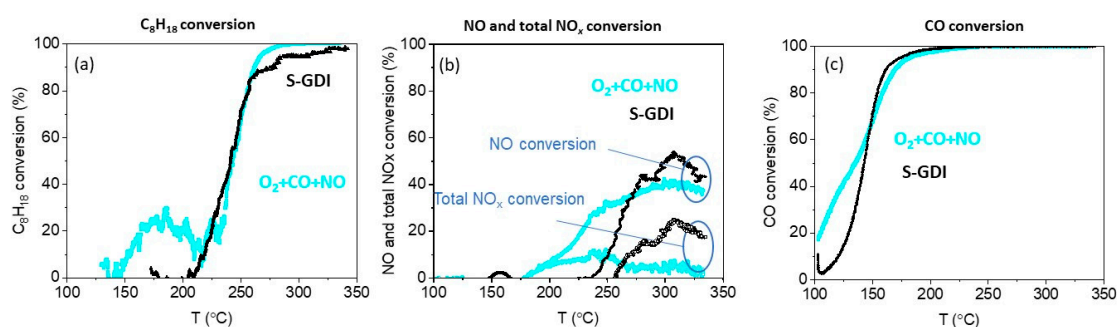

**Figure S1.** Light-off curves of isooctane (a), NO (b), and CO (c) on Pt/CeO<sub>2</sub> + Cu<sub>1</sub>/CeO<sub>2</sub> catalyst mixture (1:1 weight ratio) under fully simulated stoichiometric (S-GDI) and O<sub>2</sub>+NO+CO (0.74% O<sub>2</sub>+1400 ppm NO +3500ppm CO) conditions (space velocity: 200L h<sup>-1</sup> g<sub>Pt/CeO<sub>2</sub></sub><sup>-1</sup>).

## S2. Activity of a bi-metallic Pt/Cu<sub>1</sub>/CeO<sub>2</sub> catalyst

A bi-metallic catalyst with Pt clusters and Cu single atom sites co-impregnated on the same CeO<sub>2</sub> support was synthesized by loading the [Pt(NH<sub>3</sub>)<sub>4</sub>](NO<sub>3</sub>)<sub>2</sub> precursor on an as-synthesized Cu<sub>1</sub>/CeO<sub>2</sub> single atom catalyst (prepared by 800 °C calcination for 10 h) followed by 500 °C calcination for 4 h. Figure S1 compares the isooctane light-off curves of the Pt/CeO<sub>2</sub> monometallic catalyst, the Pt/CeO<sub>2</sub>-Cu<sub>1</sub>/CeO<sub>2</sub> catalyst mixture, and the Pt/Cu<sub>1</sub>/CeO<sub>2</sub> bi-metallic catalyst (all with equivalent Pt amount), under fully simulated LTC-G condition (10% O<sub>2</sub>, 6% H<sub>2</sub>O, 6% CO<sub>2</sub>, 2000ppm CO, 800ppm NO, 400ppm H<sub>2</sub>, 375ppm isooctane). While the light-off curves of Pt/CeO<sub>2</sub> and Pt/CeO<sub>2</sub>-Cu<sub>1</sub>/CeO<sub>2</sub> overlapped with each other, the co-impregnation catalyst Pt/Cu<sub>1</sub>/CeO<sub>2</sub> has higher light-off temperature. This indicates that co-impregnation of Pt clusters and Cu single atom sites somehow leads to the deactivation of Pt sites, probably due to the formation of Pt-Cu alloy.

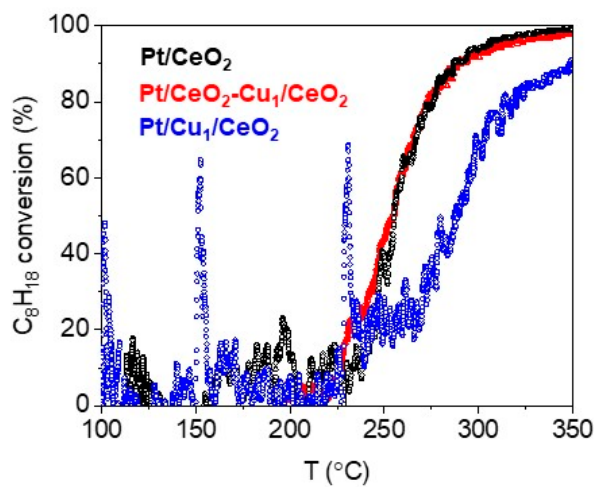

**Figure S2.** Light-off curves of isooctane on  $Pt/CeO_2$ ,  $Pt/CeO_2-Cu_1/CeO_2$ , and  $Pt/Cu_1/CeO_2$  catalysts under fully simulated LTC-G stoichiometric condition (10%  $O_2$ , 6%  $H_2O$ , 6%  $CO_2$ , 2000ppm  $CO$ , 800ppm  $NO$ , 400ppm  $H_2$ , 375ppm isooctane) (space velocity:  $200L\ h^{-1}\ g_{Pt/CeO_2}^{-1}$ ).
